# Supplementary material
Source: PubMed Central journal article supplement (PMC7071349)

**Supplementary Figure 1, related to the Experimental Methods.** Representative trace of  $\Delta\Psi$  (depicted as the 572/551 ratio) and NAD(P)H/NAD(P)<sup>+</sup> redox (expressed as RFU, Ex:Em, 350:450). Final values for each measurement were normalized based on the values recorded following a final addition of alamethicin ('Ala').

**Supplementary Figure 2, related to Figure 2.** All experiments were performed in isolated heart mitochondria at varying concentrations (0.1, 0.375, 1mg/mL) incubated with the CK clamp established with a starting PCR concentration of 1mM. Bicarbonate was present for all experiments. (A) Representative trace depicting NAD(P)H/NAD(P)<sup>+</sup> redox following the sequential addition of KMV or Pyr/M, Oligo and cyanide (CN). Pyr/M was added to KMV energized mitochondria at the end of the protocol. (B) Quantification of the data depicted in panel A. (D) Representative trace depicting NAD(P)H/NAD(P)<sup>+</sup> redox following the sequential addition of KMV, Oligo, CN, Pyr/M and Ala. The mitochondrial concentration for each experiment was 0.1mg/mL, 0.375mg/mL or 1mg/mL. (E) Quantification of the data depicted in panel C for 1mg/mL mitochondria. Note the increase in redox state from mitochondria alone ('mt') to KMV ('Sub'). (F) Relationship between NAD(P)H/NAD(P)<sup>+</sup> redox and ATP free energy in KMV energized mitochondria (1mg/mL). Data are mean  $\pm$  SEM, n=4/group, \*P<0.05.

**Supplementary Figure 3, related to Figure 3.** All experiments were performed in isolated heart and liver mitochondria incubated with the CK clamp established with a starting PCR concentration of 21mM. Bicarbonate was present for all experiments. Experiments were performed either in the presence of 5mM malonate or vehicle control. (A) Representative trace depicting  $JO_2$  in liver mitochondria in the absence and presence of 5mM malonate in response to KIC (2mM) and succinate (1mM). (B) Quantification of the KIC-dependent  $JO_2$  in the absence and presence of 5mM malonate in heart and liver mitochondria. KIC-dependent respiration was quantified by subtracting the oxygen consumption prior to the addition of KIC from the rates recorded in response to KIC. Data are mean  $\pm$  SEM, n=3-4/group.

**Supplementary Table 1.** Table indicating the concentrations of each substrate combination and inhibitor used for all experiments.

| <b>Substrate Conditions</b>                                        | <b>Concentration</b>                         |
|--------------------------------------------------------------------|----------------------------------------------|
| Pyruvate/Malate/Glutamate/Succinate/Octanoyl-carnitine (P/M/G/S/O) | Pyr: 5mM, G: 5mM, M: 2mM, S: 5mM, Oct: 0.2mM |
| Malate (Mal or M)                                                  | 2mM                                          |
| Ketoisovalerate (KIV)                                              | 2mM                                          |
| Ketoisocaproate (KIC)                                              | 2mM                                          |
| Ketomethylvalerate (KMV)                                           | 2mM                                          |
| Malonate (Malo)                                                    | 5mM                                          |
| Pyruvate (Pyr)                                                     | 5mM                                          |
| Glutamate (G)                                                      | 10mM                                         |
| Succinate (Succ)                                                   | 10mM                                         |
| Octonoyl-Carnitine (Oct)                                           | 0.2mM                                        |
| Rotenone (Rot)                                                     | 0.005mM                                      |
| Antimycin A (AntA)                                                 | 0.005mM                                      |
| Carbonyl cyanide-p-trifluoromethoxyphenylhydrazone (FCCP)          | 0.002mM                                      |
| Cyanide (Cyn)                                                      | 10mM                                         |
| Alamethicin (Ala)                                                  | 0.03mg/mL                                    |
| Oligomycin (Oligo)                                                 | 0.005mM                                      |
| Alpha-Ketoglutarate (AKG)                                          | 10mM                                         |
| NaCl                                                               | 3mM                                          |
| BCKAs                                                              | KIC, KMV, KIV: 1mM                           |
| Isocitrate                                                         | 5mM                                          |
| Carnitine (Carn)                                                   | 5mM                                          |

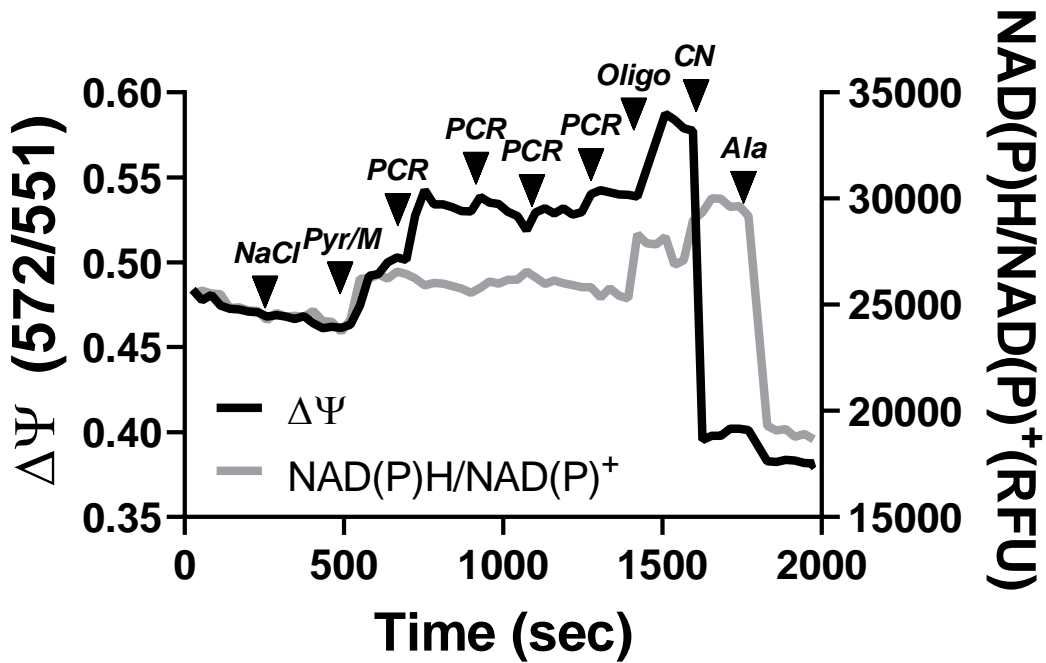

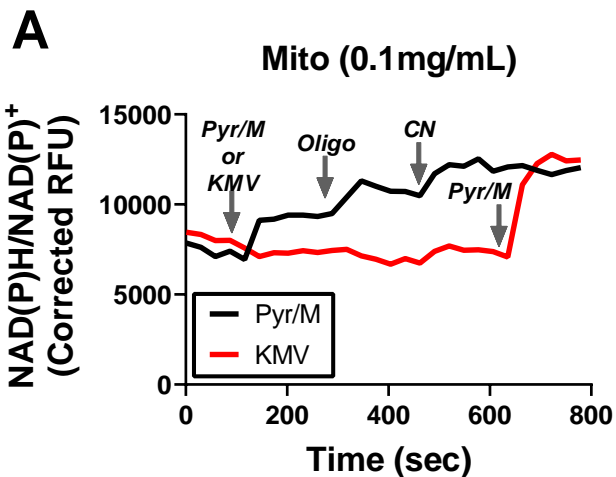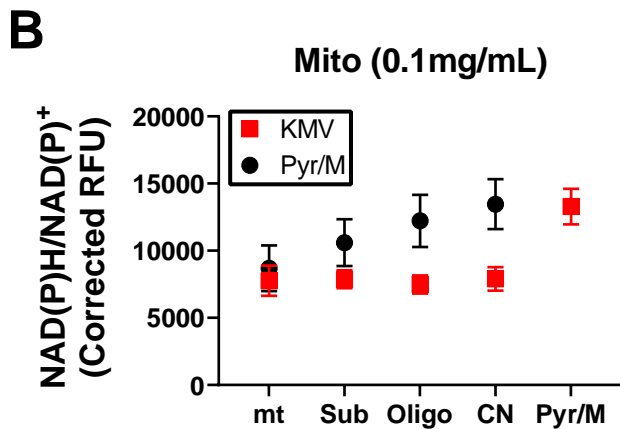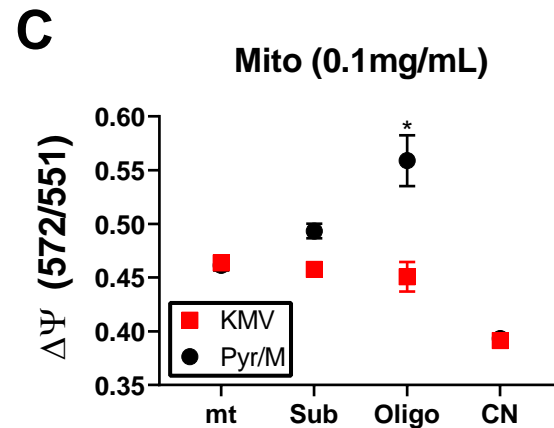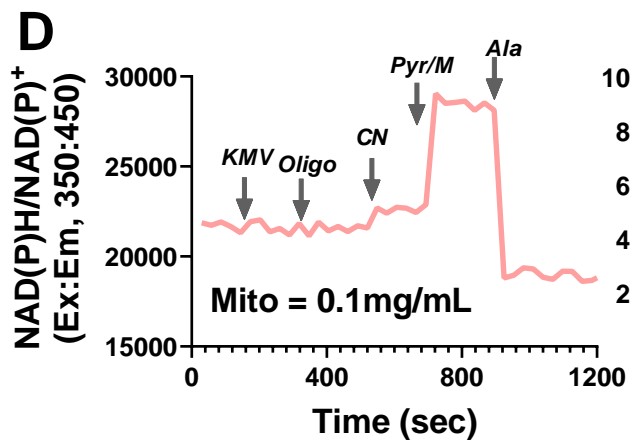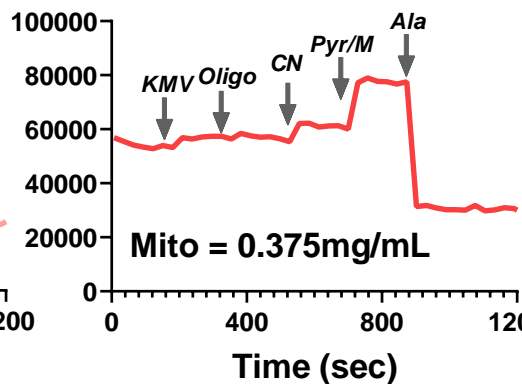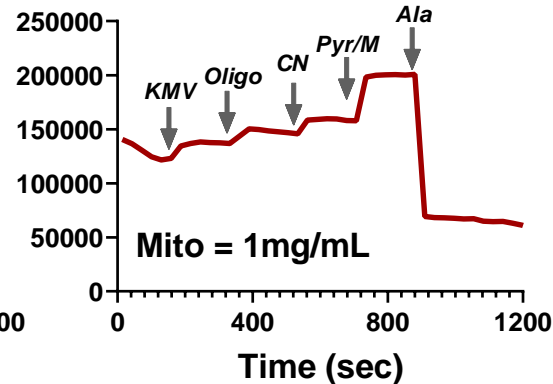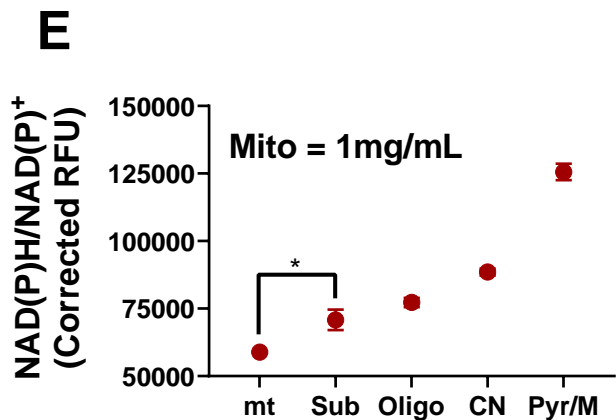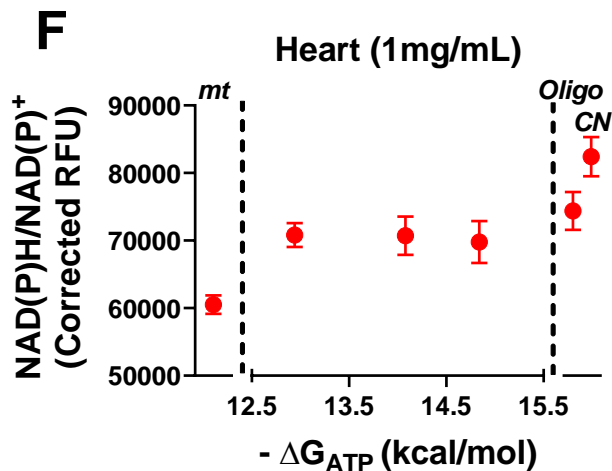

**A**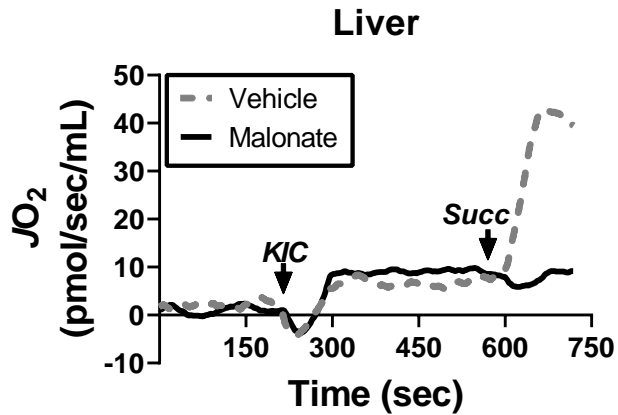**B**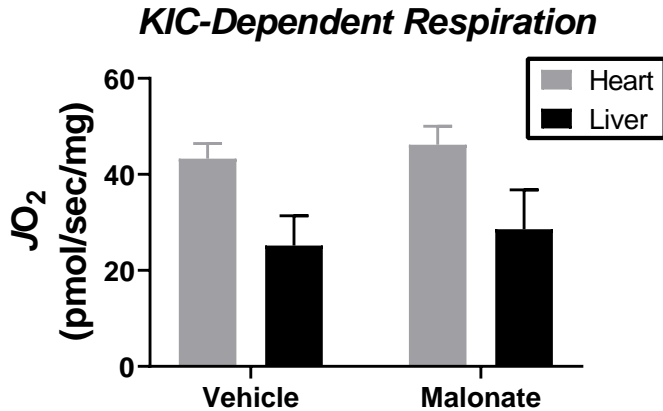

Supplement: NIHMS1053650-supplement-2.pdf [file NIHMS1053650-supplement-2.pdf]
